# Supplementary material for: Synthesis of UDP-apiose in Bacteria: The marine phototroph Geminicoccus roseus and the plant pathogen Xanthomonas pisi
Source: PubMed Central journal article supplement (PMC5607165; doi:10.1371/journal.pone.0184953), 2017-09-20
Supplement: pone.0184953.s001.pdf [file pone.0184953.s001.pdf]

Unconserved 0 1 2 3 4 5 6 7 8 9 10 Conserved

|             | 10         | 20         | 30         | 40         | 50         |
|-------------|------------|------------|------------|------------|------------|
| CeUAS       | -----      | -----      | -----      | -----      | -----      |
| GrUAS       | -----      | -----      | -----      | -----      | -----      |
| XpUAS       | -----      | -----      | -----      | -----      | -----      |
| YpUAS       | -----      | -----      | -----      | -----      | -----      |
| RsU4kpxs    | -----      | -----      | -----      | -----      | -----      |
| ArnA        | -----      | -----      | -----      | -----      | -----      |
| AtUAS1      | -----      | -----      | -----      | -----      | -----      |
| ZmUAS1      | -----      | -----      | -----      | -----      | -----      |
| PpUAS       | -----      | -----      | -----      | -----      | -----      |
| NdUAS       | -----      | -----      | -----      | -----      | -----      |
| MvUAS       | -----      | -----      | -----      | -----      | -----      |
| MpUAS       | -----      | -----      | -----      | -----      | -----      |
| hUXS        | MVSKALLRLV | SAVNRRRMKL | LLGIALLAYV | ASVWGNFVNM | RSIQENGELK |
| MmUXS       | MVSKGLLRLV | SSVNRRRMKL | LLGIALFAYA | ASVWGNFVNM | RSIQENGELK |
| SmUXS       | -----      | -----      | -----      | -----      | -----      |
| RmUXS       | -----MS    | TTVGHKHVGS | DVELSYL    | -----      | -----      |
| AtUXS3      | -----      | -----      | -----      | -----      | -----      |
| Consistency | 0000000000 | 0000000000 | 0000000000 | 0000000000 | 0000000000 |

|             | 60         | 70         | 80         | 90         | 100        |
|-------------|------------|------------|------------|------------|------------|
| CeUAS       | -----      | -----      | -----      | -----      | MKILLL     |
| GrUAS       | -----      | -----      | -----      | -----      | MVIL       |
| XpUAS       | -----      | MQRNPISQE  | RES        | -----      | VLKLIIL    |
| YpUAS       | -----      | MR         | IGTE       | NP         | -----      |
| RsU4kpxs    | -----      | -----      | -----      | -----      | MKKVLIL    |
| ArnA        | -----      | OTLG       | LVQGSRLNSQ | FACTARR    | -----      |
| AtUAS1      | -----      | MANGANRVDL | DGKPIQ     | -----      | PLTICMI    |
| ZmUAS1      | -----      | M          | ANRVDL     | DGRPIK     | -----      |
| PpUAS       | -----      | M          | TARLNL     | DGQEIK     | -----      |
| NdUAS       | -----      | MA         | GGIRLDL    | DGRPVA     | -----      |
| MvUAS       | -----      | MA         | PRLDL      | QGREIK     | -----      |
| MpUAS       | -----      | M          | APRLDL     | EGRCIQ     | -----      |
| hUXS        | IESKIEEMVE | PLR        | EKIRDL     | EKSFTQKYP  | PVKFLSEK   |
| MmUXS       | IESKIEEIVE | PLR        | EKIRDL     | EKSFTQKYP  | PVKFLSEK   |
| SmUXS       | -----      | MN         | YFRNDF     | RGTLFGTNE  | ATDSLRRR   |
| RmUXS       | RDLYLPKEKN | YVE        | HKDSTI     | IYRHISFP   | PVKQLSPS   |
| AtUXS3      | -----      | MAATS      | EKQNTTKPPP | SPSPLRNSKF | CQPNMRILIS |
| Consistency | 0000000000 | 1110113243 | 0221223000 | 0000000000 | 0002458586 |

|             | 110        | 120        | 130        | 140        | 150                |
|-------------|------------|------------|------------|------------|--------------------|
| CeUAS       | GGGGFIGCHI | TQKLLQST-D | HLVNCYD    | -----      | LFDA RLQDSLGH-     |
| GrUAS       | GCGGFVGS   | LDNLLRDESY | LIEGWD     | -----      | EDR KIRQHLDN-      |
| XpUAS       | GCGGFVGS   | LDRLLSRSDM | EIEGWD     | FD         | -----AS KITKHIDF-  |
| YpUAS       | GCGGFVGS   | LDRLLSRSDM | KIVGWD     | PE         | -----SS KIRKHLN-   |
| RsU4kpxs    | GVNGFIGHHL | SKRILESTDP | EISQWE     | VY         | GMDMQTE RLGDVLNHP- |
| ArnA        | GVNGFIGNHL | TERLLREDHY | EYVGLD     | IG         | SD-----AISRFLNHP-  |
| AtUAS1      | GAGGFVGS   | CEKLLTETPH | KVLALD     | VY         | NDKIKHLL EPDTEVWS- |
| ZmUAS1      | GAGGFVGS   | CEKLLMETLH | TVIAVDVYND | KI         | RHLEPA ETECAWS-    |
| PpUAS       | GAGGFVGS   | CEKLMETTKH | SVLAID     | VC         | GVKIQHL LALGQPWS-  |
| NdUAS       | GAGGFVGS   | CEALMWETHH | TVIAID     | -----      | VSGDKIE HLLKEGSPWS |
| MvUAS       | GAGGFVGS   | CEKLMWETE  | SVLAID     | -----      | MYGEKIQ HLLTPSQAWS |
| MpUAS       | GAGGFVGS   | CEALLWNTHE | SILAVDI    | -----      | FCDKIQ HLLSPGEWS   |
| hUXS        | GGAGFVGS   | TDKLMMD-GH | EVTVVDN    | -----      | FFTGRKR NVEHWIGHE- |
| MmUXS       | GGAGFVGS   | TDKLMMD-GH | EVTVVDN    | -----      | FFTGRKR NVEHWIGHE- |
| SmUXS       | GGAGFLGS   | CELLLGA-GH | EVICLDN    | -----      | FSTGLRR NIAPLKRFD- |
| RmUXS       | GGAGFVGS   | VDRLMWM-GH | EVVVLN     | -----      | FFTGTKR NVQHWIGHP- |
| AtUXS3      | GGAGFVGS   | VDKLMENEKN | EVVVDN     | -----      | YFTGSKE NLKKWIGHP- |
| Consistency | *46*9*7*9  | 4769834336 | 5954481000 | 0001211234 | 4633243420         |

|             | 160         | 170        | 180        | 190        | 200        |
|-------------|-------------|------------|------------|------------|------------|
| CeUAS       | -RFNYIHGDI  | RHDHTRVEKL | IHD---ADV  | VDLIAYANFS | LYVSIPLDVF |
| GrUAS       | -RFTLHRSIA  | N-APEALVEV | ERAIRECDVV | VNLAAICNPA | DYNTRPLSVI |
| XpUAS       | -RFTLFHQVPC | I-DDVELSRL | ERLAEADAL  | VNLAAICNPA | QYNTQPLDVI |
| YpUAS       | -NFTLHQRYV  | D-DVETQDDL | REAVAEGDVV | INLAAICNPS | EYNTNPLSVI |
| RsU4kpxs    | -RMHFFEGDI  | T-INKEWVEY | HVR--KCDVI | LPLVAIATPS | TYVKAFLRVF |
| ArnA        | -HFHFVEGDI  | S-IHSEWIEY | HVK--KCDVV | LPLVAIATPI | EYTRNPLRVF |
| AtUAS1      | GRIQFHRINI  | K-HDSRLEGL | VKM---ADLI | INLAAICTPA | DYNTRPLDTI |
| ZmUAS1      | GRIQFHRLNI  | K-HDSRLEGL | IKM---SDLT | INLAAICTPA | DYNTRPLDTI |
| PpUAS       | DRIEFYKINI  | K-SDTRLEGL | IKV---SDLV | INLAAICTPA | DYNTRPLDTI |
| NdUAS       | DRISFHAFNI  | R-HDSRLETF | IRV---ADLT | INLAAICTPA | DYNTRPLDTI |
| MvUAS       | DRIEFYKINI  | K-HDPRLEGL | VKL---ADVT | INLAAICTPA | DYNTRPLETI |
| MpUAS       | NRIDFFHINI  | K-HDPQTEML | IKIS---DVV | INLAAICTPA | DYNTRPLDTI |
| hUXS        | -NFELINH DV | -----VEPL  | YIEV---DQI | YHLASPASPP | NMYNPIKTL  |
| MmUXS       | -NFELINH DV | -----VEPL  | YIEV---DQI | YHLASPASPP | NMYNPIKTL  |
| SmUXS       | -TFRVIAHDV  | -----VEPI  | DLEV---DEI | YNLACPASPP | HYQADPIQTT |
| RmUXS       | -HFELVRHDV  | -----VDPF  | MVEV---SQI | YHLACPASPP | HYQYNPTKTV |
| AtUXS3      | -RFELIRHDV  | -----TEPL  | LIEV---DRI | YHLACPASPI | FYKYNPVKTI |
| Consistency | 0665644358  | 2012225637 | 3441002957 | 66*87566*5 | 4*555*8577 |

|             | 210        | 220        | 230        | 240         | 250         |
|-------------|------------|------------|------------|-------------|-------------|
| CeUAS       | NLNFTENLKI | TEYCVTHQ   | -----KR    | LIQFSTCEVY  | GKTVASL---  |
| GrUAS       | RANLFEVYPI | VELCAKYKRW | LVSFSTSE   | TYGRTIASYLP | QTYDDP----  |
| XpUAS       | RANLLDSYPI | VEACARAG   | -----TW    | LVYFSTSEVY  | GRTLSSY---  |
| YpUAS       | KSNLFDVYPI | VELCVEYK   | -----RW    | LISFSTSECY  | GRTLSSYV--- |
| RsU4kpxs    | ELDFEANLPI | VRSAAKYR   | -----KH    | LVFPSTSEVY  | GMCG-----   |
| ArnA        | ELDFEENLRI | IRXCVKYR   | -----KR    | IIFPSTSEVY  | GMC-----    |
| AtUAS1      | YSNFIDALPV | VKYCSENN   | -----KR    | LIHFSTCEVY  | GKTIGSFLPK  |
| ZmUAS1      | YSNFIDALPV | VKYCSEYA   | -----KR    | VIHFSTCEVY  | GKTIGSFLPK  |
| PpUAS       | YSNFVDALPV | VQQCRDNG   | -----KR    | LIHFSTCEIY  | GKTIGSFLPR  |
| NdUAS       | HSNFVDALPV | VRMCADYN   | -----KR    | LIHFSTCEVY  | GKTLANFLPR  |
| MvUAS       | YSNFIDALPV | VRMCADNK   | -----KR    | LIHFSTCEVY  | GKTIGSFLPE  |
| MpUAS       | YSNFIDALPV | VRYCTDN    | -----NKR   | LIHFSTCEVY  | GKTIGCFLPN  |
| hUXS        | KTNTIGTLNM | LGLAKRV    | -----GAR   | LLLASTSEVY  | GDPE-----   |
| MmUXS       | KTNTIGTLNM | LGLAKRV    | -----GAR   | LLLASTSEVY  | GDPE-----   |
| SmUXS       | KTCVIGSLNL | LDLAARR    | -----GAR   | IFQASTSEIY  | GDPH-----   |
| RmUXS       | KTSVMGTINM | LGLAKRT    | -----KAR   | FLLTSTSEVY  | GDPE-----   |
| AtUXS3      | KTNVIGTLNM | LGLAKRV    | -----GAR   | ILLTSTSEVY  | GDPL-----   |
| Consistency | 4675555757 | 7457553100 | 0000000066 | 7744995889  | *453122110  |

|             | 260        | 270        | 280        | 290        | 300            |
|-------------|------------|------------|------------|------------|----------------|
| CeUAS       | ----LQNQLP | DHDNPAHAVF | QEDNTAF    | ----ILGPVN | KHRWIVSCAK     |
| GrUAS       | ----EL     | YELREDETPL | IMGPIN     | ----QRWT   | ----YACAK      |
| XpUAS       | ----VKTG   | SDDPDLIELR | EEQTPLI    | -MG PVS    | NQRWT----YACAK |
| YpUAS       | GDTTYENPDL | YELKEDETPL | IMGPVNV    | ----QRWT   | ----YACAK      |
| RsU4kpxs    | -----      | DDDFD      | PEASPLV    | -YG PINK   | PRWI----YACSK  |
| ArnA        | -----      | SDKYF      | DEDHSNL    | IVG PVNK   | PRWI----YSVSK  |
| AtUAS1      | DHPLRDDPAF | YVLKEDISPC | IFGSIK     | ----QRWS   | ----YACAK      |
| ZmUAS1      | DHPLRLQPEF | YVLNENETPC | IFGSIK     | ----QRWS   | ----YACAK      |
| PpUAS       | DHPLKADPAF | SVLKEDETAC | IYGSIHK    | ----QRWS   | ----YACAK      |
| NdUAS       | DSLARQDPY  | FVLKEDQTPY | IYGPVEL    | ----QRWS   | ----YACAK      |
| MvUAS       | GSSLRKDKKY | YLLKEDASPC | IFGPIK     | ----QRWS   | ----YACAK      |
| MpUAS       | DSPLR-KDNF | YVLKEDESPC | IFGSIDK    | ----QRWS   | ----YCGAK      |
| hUXS        | -----      | -VHPQSEDIW | GHVNPIG    | ----PRAC   | ----YDEGK      |
| MmUXS       | -----      | -VHPQSEDIW | GHVNPIG    | ----PRAC   | ----YDEGK      |
| SmUXS       | -----      | -VHPQVESYW | GNVNPIG    | ----PRSC   | ----YDEGK      |
| RmUXS       | -----      | -EHPQKESYW | GHVNPIG    | ----PRAC   | ----YDEGK      |
| AtUXS3      | -----      | -IHPQKESYW | GNVNPIG    | ----VRSC   | ----YDEGK      |
| Consistency | 1001101111 | 1434545543 | 3345433000 | 0000595400 | 00000*557*     |

|             | 310        | 320        | 330        | 340        | 350         |
|-------------|------------|------------|------------|------------|-------------|
| CeUAS       | QLLERIIHAY | GLEDRLNYTI | IRPFNF--IG | PRIDFLP-SE | Q-----EG    |
| GrUAS       | QMTERLIYAH | HDEEGLPFTI | IRPLNF--FG | PRMDYIPTRD | G-----DG    |
| XpUAS       | QMMERIVYAH | HSTSGMPFTI | IRPLNF--FG | -----P     | RM-----DYI  |
| YpUAS       | QMVERLVYAH | HKEDGLPFTV | VRPLNF--FG | -----P     | RM-----DYI  |
| RsU4kpxs    | QLMDRVIWGY | -GMEGLNFTL | FRPFNW--IG | PGLDSI-HTP | K-----EG    |
| ArnA        | QLLDRVIWAY | GEKEGLQFTL | FRPFNW--MG | PRLDNL-NAA | R-----IG    |
| AtUAS1      | QLIERLVYAE | GAENGLEFTI | VRPFNW--IG | -----P     | RMDFIPGIDG  |
| ZmUAS1      | QLIERLVYAE | GAENGLEFTI | VRPFNW--IG | -----P     | RMDFIPGIDG  |
| PpUAS       | QLIERLIFGE | GAENGMKFTI | VRPFNW--IG | -----P     | RMDFIPGIDG  |
| NdUAS       | QLIERVIYGE | SMENGLQFTI | VRPFNW--IG | -----P     | RMDFIPGIDG  |
| MvUAS       | QLIERVIYAE | GMENDLAFTI | VRPFNWXLYP | -----W     | C-----GW    |
| MpUAS       | QLLERLVYAE | GAENDLKFTI | VRPFNW--IG | PRMD----   | FIPGVDGPSHA |
| hUXS        | RVAETMCYAY | MKQEGVEVRV | ARIFNT--FG | -----P     | R-----MH    |
| MmUXS       | RVAETMCYAY | MKQEGVEVRV | ARIFNT--FG | -----P     | R-----MH    |
| SmUXS       | RCAETLFFDF | HKSHGVEIKI | VRIFNT--YG | -----P     | R-----MR    |
| RmUXS       | RIAETLTYSY | MRQEGVDVVR | ARIFNT--FG | -----P     | R-----MS    |
| AtUXS3      | RVAETLMFDY | HRQHGIEIRI | ARIFNT--YG | -----P     | R-----MN    |
| Consistency | 8759776765 | 3465775668 | 6*68*50069 | 000000005  | 610000033   |

|             | 360        | 370        | 380        | 390         | 400         |
|-------------|------------|------------|------------|-------------|-------------|
| CeUAS       | NP-----R   | VFS---HFL  | D---ALKTG  | EPMKLINGGH  | QRRTYTYIDD  |
| GrUAS       | VP-----R   | VLA---CFM  | A---ALLSG  | EPMQLVDGGQ  | ARRTIVSIYE  |
| XpUAS       | PRSDGEGIPR | VLA---CFM  | A---ALLRG  | DPMKLVDGGQ  | ARRTIVAIIEE |
| YpUAS       | PQRDGDGVP  | VLA---CFM  | G---ALLNG  | DPMKLVDGGK  | ARRTIVSIYE  |
| RsU4kpxs    | SS-----R   | VVT---QFL  | G---HIVRG  | ENIQLVDGGQ  | QKRAFTYVDD  |
| ArnA        | SS-----R   | AIT---QLI  | L---NLVEG  | SPIKLLIDGGK | QKRCFTDIRD  |
| AtUAS1      | PS-----E   | GVP---RVL  | ACFSNLLRR  | EPLKLVDDGGE | SQRTFVYIND  |
| ZmUAS1      | PS-----E   | GVP---RVL  | ACFSNLLRG  | EPLKLVDDGGE | SQRTFIYIKD  |
| PpUAS       | PS-----D   | SIP---RVL  | ACFSNLMKG  | EPLKLVDDGK  | SQRTFIYIKD  |
| NdUAS       | PS-----D   | GVP---RVL  | ACFSTNLLRG | EPLKLVDDGGR | SQRTFVYIKD  |
| MvUAS       | PQ-----R   | RCTKSPSMLQ | ----HYLMRG | EPLKLVDDGK  | SQRTFVYIKD  |
| MpUAS       | VP-----R   | VLA---CFS  | M---ALMKE  | EPLKLVDDGK  | AQRTFCYIKD  |
| hUXS        | MND-----GR | VVS---NFI  | L---QALQG  | EPLTVYGS GS | QTRAFQYVSD  |
| MmUXS       | MND-----GR | VVS---NFI  | L---QALQG  | EPLTVYGS GS | QTRAFQYVSD  |
| SmUXS       | PDD-----GR | VVS---NFI  | V---QALKG  | EDITIYGDGS  | QTRSFQYVED  |
| RmUXS       | PAD-----GR | VVS---NFI  | M---QAIRG  | ESLTLYGDGE  | QTRSFQYIHD  |
| AtUXS3      | IDD-----GR | VVS---NFI  | A---QALRG  | EALTVQKPGT  | QTRSFQYVSD  |
| Consistency | 4410000007 | 5750000366 | 4000047768 | 86868666*5  | 65*6746948  |

|             | 410          | 420          | 430          | 440          | 450          |
|-------------|--------------|--------------|--------------|--------------|--------------|
| CeUAS       | AVDCIVRIVE   | NPNOVCDKEI   | FNIGSPD-N-   | EISIRDLAFK   | MRCIYKRRWW   |
| GrUAS       | AVDAIRRVLV   | RP-ETSQNGI   | FNIG-NP-NN   | EVTIAELADA   | MRRTYARITG   |
| XpUAS       | AVEAIIARILD  | RPLE-AQNQI   | FNIG-NR-NN   | EVTMRGLAEL   | MRDVYAEITD   |
| YpUAS       | AVDAICRMLD   | NPEK-ANGHA   | FNIG-NR-NN   | EVTMAELADM   | MRKTYAKITG   |
| RsU4kpxs    | GIDALVRIIA   | NKDGVASGKI   | YNIG-NP-SN   | NYSVRELAEM   | MLKKAGT--I   |
| ArnA        | GIEALYRIIE   | NAGNRCDEI    | INIG-NP-EN   | EASIEELGEM   | LLASFEKHPL   |
| AtUAS1      | AIEAVLLMIE   | NPER-ANGHI   | FNVG-NP-NN   | EVTVRQLAEM   | MTEVYAKVSG   |
| ZmUAS1      | AIEAVLLMIE   | NPER-ANGQI   | FNVG-NP-NN   | EVTVRQLAEM   | MTEVYSKVSG   |
| PpUAS       | AIEAVQKIIIE  | NPAR-ANGHI   | FNVGNPH-NE   | VTIQ-ELAEL   | MTDLYCKISG   |
| NdUAS       | AIKAVMLMIE   | NPER-ANGHI   | FNVGNPK-NE   | ATIR-ELAEM   | MVDVYSRVSG   |
| MvUAS       | AIEAVMLMIE   | NAEE-SNGHI   | FNVG-NPDNE   | ASVR-ELANL   | MTEIYCKVSG   |
| MpUAS       | AIDAVLRIIE   | NPDR-ANMRI   | FNVGNPM--N   | EASVKELAEV   | MTDVYCKISG   |
| hUXS        | LVNGLVALMN   | S--N-VSSP    | VNLG-NP--E   | EHTILEFAQL   | IKNLV-----   |
| MmUXS       | LVNGLVALMN   | S--N-VSSP    | VNLG-NP--E   | EHTILEFAQL   | IKNLV-----   |
| SmUXS       | LIDGFVRLMA   | SPPS--LTGP   | VNLG-NP--A   | EFTIGELAE    | VIRLTG-----  |
| RmUXS       | LVDGLILLMN   | S--D-YSDP    | VNLG-NP--D   | EYTIKEFANT   | I REMVLT PPL |
| AtUXS3      | MVDGLIRLME   | G--N-DTGP    | INIG-NP--G   | EFTMVELAET   | VKELIN-----  |
| Consistency | 696675577460 | 642503454470 | 6*8*06503480 | 746628896490 | 744554322300 |

|             |             |              |     |          |            |      |     |           |
|-------------|-------------|--------------|-----|----------|------------|------|-----|-----------|
| CeUAS       | RGQTELP EPI | EVSGETF YGE  | GYD | -----    | DSDRR I    | ---- | --- | PDI TKAQ  |
| GrUAS       | DARYNDHPIV  | VTADAFYGA    | GYE | -----    | DCDRR M    | ---- | --- | PDISKAE   |
| XpUAS       | DPRY-----   | REHPIVEVSS   | EEF | -----    | YGKGYEDCDR | RMP  | --- | DLTQAN    |
| YpUAS       | DPSYEDYPII  | EVSSEEFYGE   | GYE | -----    | DCDRR      | ---- | --- | MPDISKAK  |
| RsU4kpxs    | AEYKE-----  | NAQVKLVET    | TSG | AYYGKGY  | QDVQNR     | ---- | --- | VPKIAN TM |
| ArnA        | RHHFP-----  | PFAGFRV VES  | SSY | -----    | YGKGYQDVEH | RKP  | --- | SIRNAH    |
| AtUAS1      | EG-AIESPTV  | DVSSKEFYGE   | GYD | -----    | SDKRI      | ---- | --- | PDMTIIN   |
| ZmUAS1      | GK-ILDVPTI  | DVSSSEEFYGE  | GYD | -----    | SDKRI      | ---- | --- | PDMTIIN   |
| PpUAS       | TA-RPEVTV   | DVPSKEFYGV   | GYD | -----    | SDKRI      | ---- | --- | PMTQVR    |
| NdUAS       | EP-IPETPML  | DISSQAFYGE   | GYD | -----    | DSDRR I    | ---- | --- | PDMVIQ    |
| MvUAS       | KPEPEIPTVD  | VSSKEFYGEG   | YDD | -----    | SDKRIP     | ---- | --- | DMTIK     |
| MpUAS       | KS-KPNLTTI  | DISSKEFYGE   | GYE | -----    | DSDRR I    | ---- | --- | PDMKLV T  |
| hUXS        | -----       | SGSEIQFLSE   | AQD | -----    | DPQKRK     | ---- | --- | PDIKKAK   |
| MmUXS       | -----       | SGSEIQFLSE   | AQD | -----    | DPQKRK     | ---- | --- | PDIKKAK   |
| SmUXS       | -----       | SRSKIVRRPL   | PVD | -----    | DPRQRR     | ---- | --- | PDISLAT   |
| RmUXS       | -----       | SPHNVDIKILPA | AED | -----    | DPKRRK     | ---- | --- | PDIRAK    |
| AtUXS3      | -----       | PSIEIKMVEN   | TPD | -----    | DPRQRR     | ---- | --- | PDISKAK   |
| Consistency | 2101110111  | 4355445454   | 446 | 00000000 | 6456630000 | 000  | 000 | 5875465   |

|             | ..... 510 ..... | 520 .....   | 530 .....  | 540 .....  | 550        |            |
|-------------|-----------------|-------------|------------|------------|------------|------------|
| CeUAS       | QLLGWQPRYN      | LDQTELEYSMG | YWFNGEEGTS | WIPQFT     | ----       |            |
| GrUAS       | RLLGWVPRMS      | LAEVLYGTMQ  | SYHD TYT   | APKAA      | ----       |            |
| XpUAS       | TLLDWYPRRN      | LRDILLPTMR  | DYHIR      | YA         | ATSEPEEATQ |            |
| YpUAS       | ELLGWEPKIA      | LEDVLLDTMT  | YFHNE      | YA         | GAMKPAQVAE |            |
| RsU4kpxs    | EELGWKPTTT      | MEDTLANIFE  | AYREH      | AA         | EARSLVD    |            |
| ArnA        | RCLDWEPKID      | MQETIDETLD  | FFLRT      | VD         | LTDKFS     |            |
| AtUAS1      | RQLGWNPKTS      | LWDLLESTLT  | YQHRT      | YAEAVKKATS | KPVAS      |            |
| ZmUAS1      | KQLGWNPKTS      | LPDLESTLT   | YQHKT      | YAEAIKRDIA | KSTAS      |            |
| PpUAS       | KQLEWEPKTS      | MYDLMEHTLK  | YQYSTYA    | EA         | VKKAMSKSTY |            |
| NdUAS       | RQLGWEPQTP      | LPDLEITLTK  | HQYLYT     | AA         | AVKASMA    |            |
| MvUAS       | RQLGWEPKTS      | LPDLESTLT   | YQHNT      | YAHAVQQAMC | KVLAST     |            |
| MpUAS       | RQLEWQPTTS      | LHDLLEFTLA  | YQHKT      | YSQAVRECVS | KTFSTSDI   |            |
| hUXS        | LMLGWEPVVP      | LEEGLNKAIH  | YFRKELEYQA | NNQYIPKPKP | ARIKKGRTRH |            |
| MmUXS       | LMLGWEPVVP      | LEEGLNKAIH  | YFRKELEYQA | NNQYIPKPKP | ARVKKGRTRH |            |
| SmUXS       | EELGWRPKVN      | LAEGLAHTIR  | YFDDL LSR  | ---        | MRESAELV   |            |
| RmUXS       | TYLGWEPKFS      | VKHGLQETVD  | WFKSQVAEGA | I          | ----       |            |
| AtUXS3      | EVLGWEPKVK      | LREGLPLMEE  | DFRLRLNVPR | N          | ----       |            |
| Consistency | 54*7*5*655      | 8374943764  | 55444      | 11012      | 2333222111 | 1000000000 |

.  
 CeUAS -  
 GrUAS -  
 XpUAS -  
 YpUAS -  
 RsU4kpxs -  
 ArnA -  
 AtUAS1 -  
 ZmUAS1 -  
 PpUAS -  
 NdUAS -  
 MvUAS -  
 MpUAS -  
 hUXS S  
 MmUXS S  
 SmUXS -  
 RmUXS -  
 AtUXS3 -  
 Consistency 0
